# Supplementary material for: Contrast responses of strong and weak winter extreme cold events in the Northern Hemisphere to global warming
Source: Springer Nature journal article supplement (doi:10.1007/s00382-023-06822-7), 2023-05-13
Supplement: 382_2023_6822_MOESM1_ESM.pdf [file 382_2023_6822_MOESM1_ESM.pdf]

**Supplementary Information for**  
**Contrast responses of strong and weak winter extreme cold events in the**  
**Northern Hemisphere to global warming**

Yongli He<sup>1,2\*</sup>, Xiaoxia Wang<sup>1</sup>, Boyuan Zhang<sup>1</sup>, Zhanbo Wang<sup>1</sup>,  
Shanshan Wang<sup>1</sup>

<sup>1</sup> Key Laboratory for Semi-Arid Climate Change of the Ministry of Education, College  
of Atmospheric Sciences, Lanzhou University, Lanzhou, Gansu, China

<sup>2</sup> Collaborative Innovation Center for Western Ecological Safety, Lanzhou, China

Corresponding author: Yongli He (heyongli@lzu.edu.cn)

Submit to CD

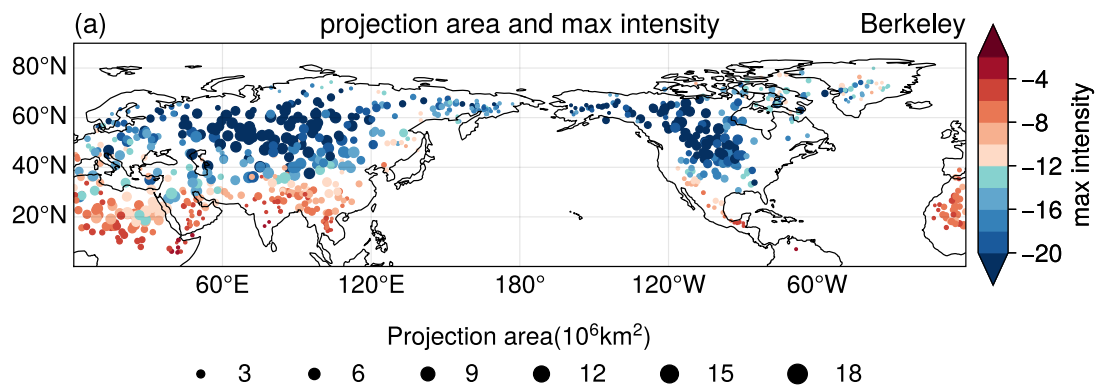

Figure S1. Same to Figure 2, but for Berkeley dataset.

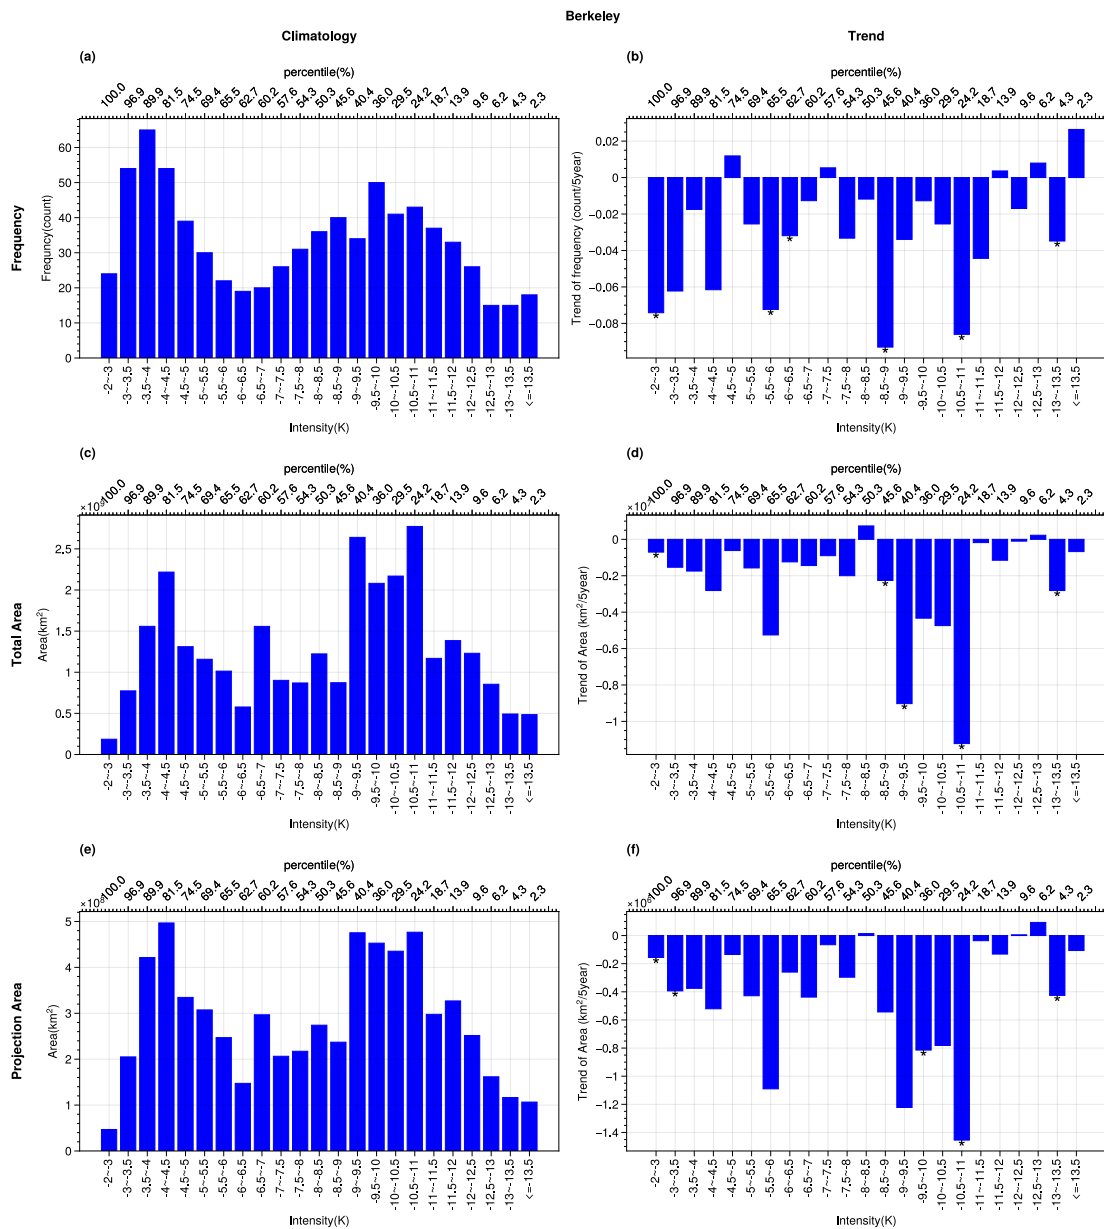

Figure S2. Same to Figure 5, but based on Berkeley dataset.

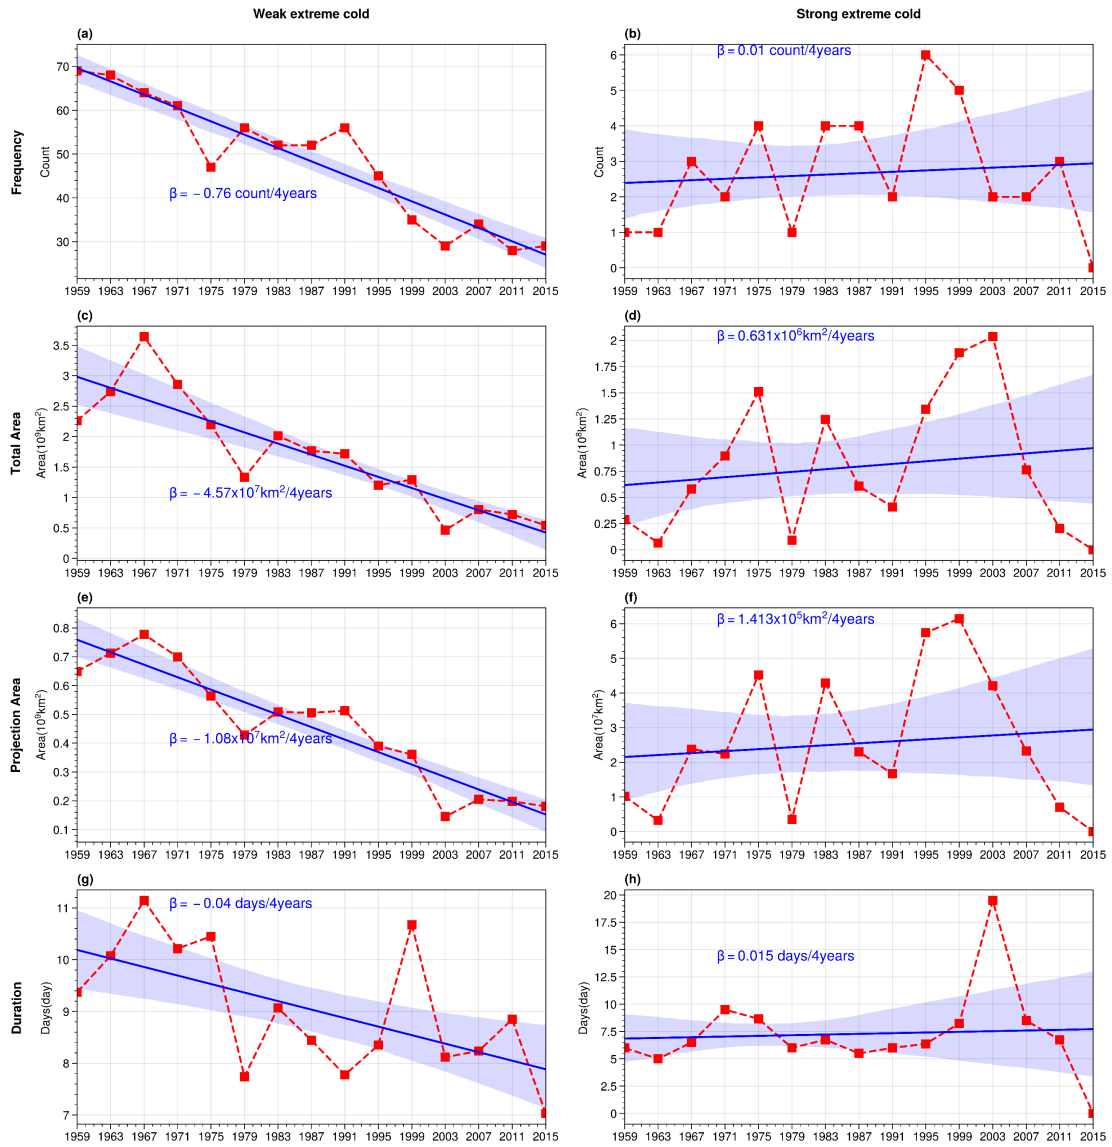

Figure S3. Same to Figure 6, but for every 4 years interval.

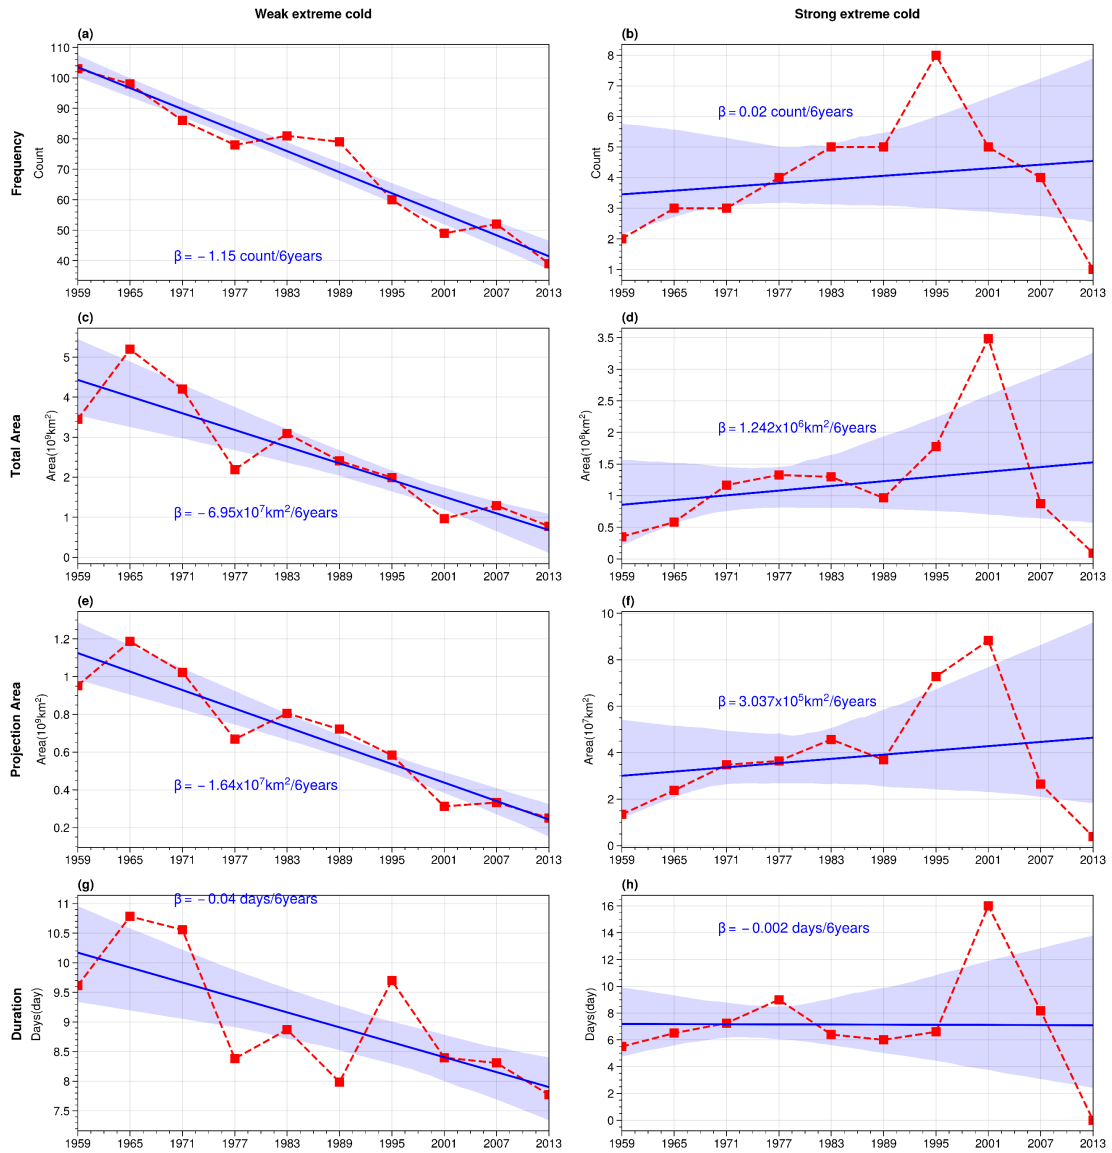

Figure S4. Same to Figure 6, but for every 6 years interval.

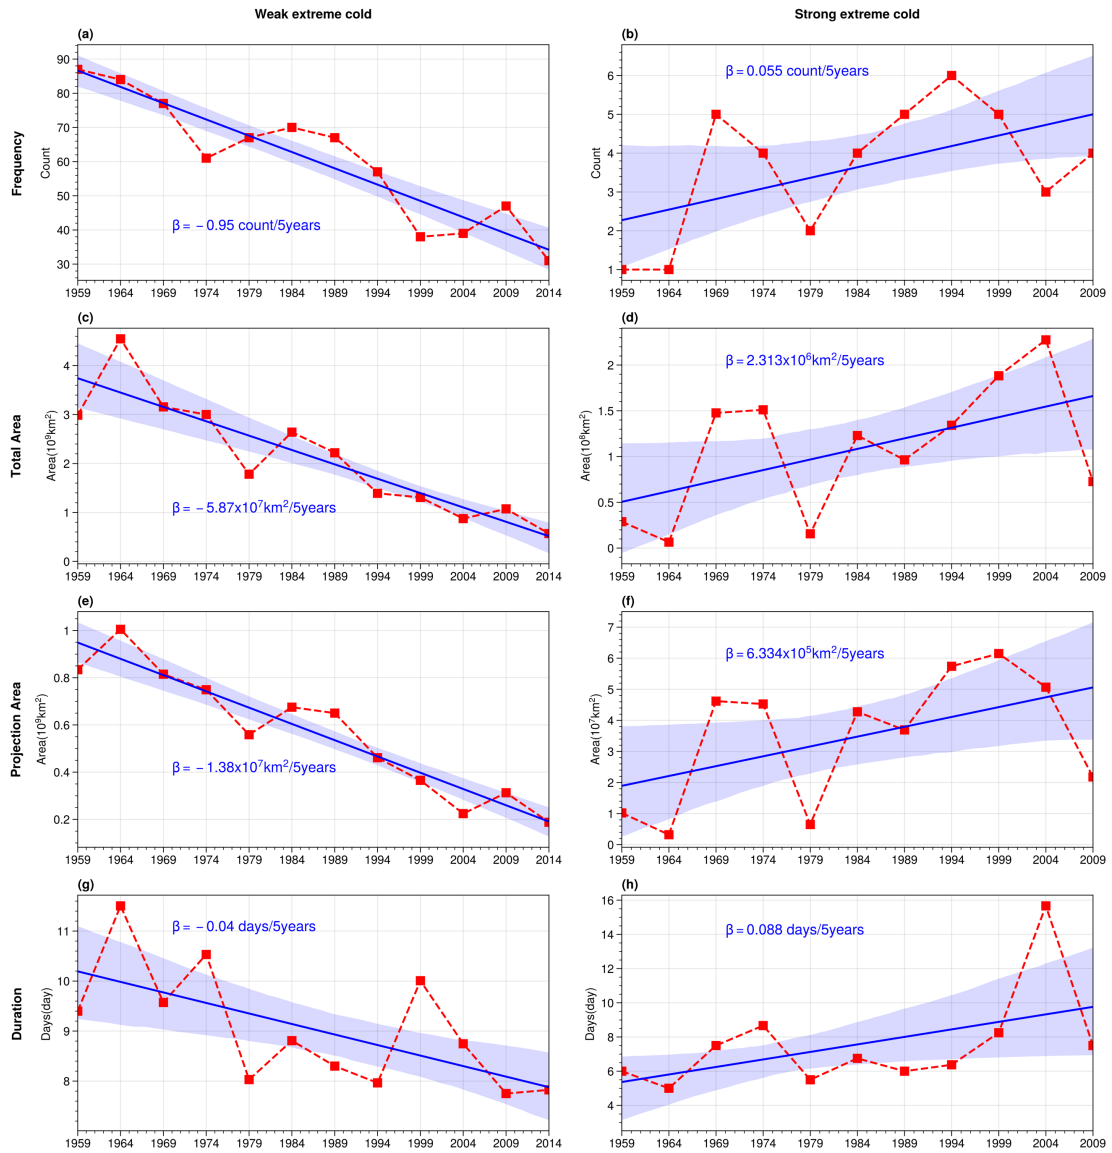

Figure S5. Same to Figure 6, but for the trend after excluding the period of 2014-2019.

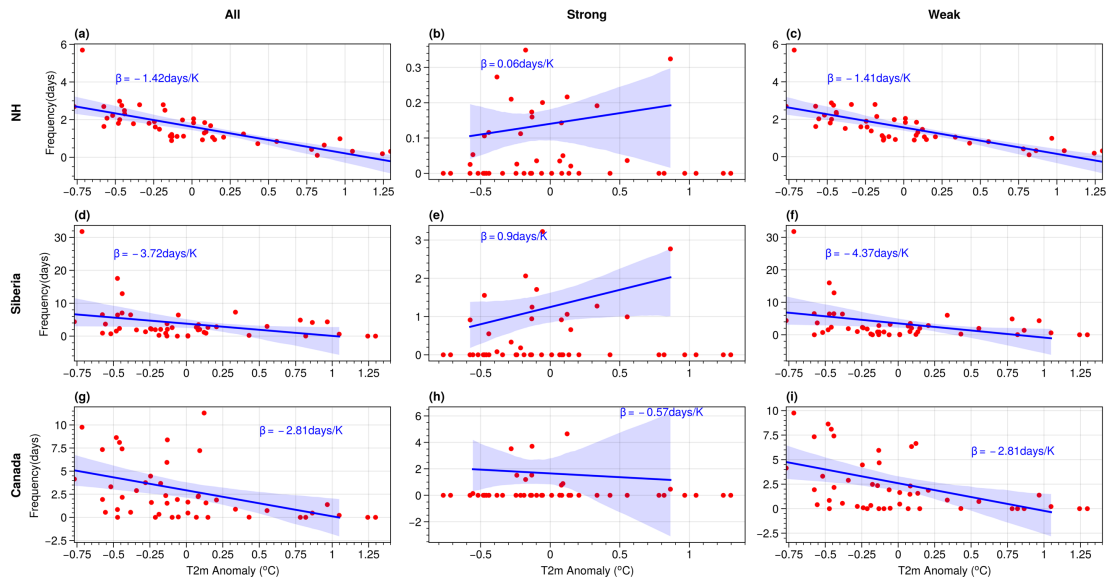

Figure S6. Same to Figure 9 but exclude the warming hiatus period (1998-2012).

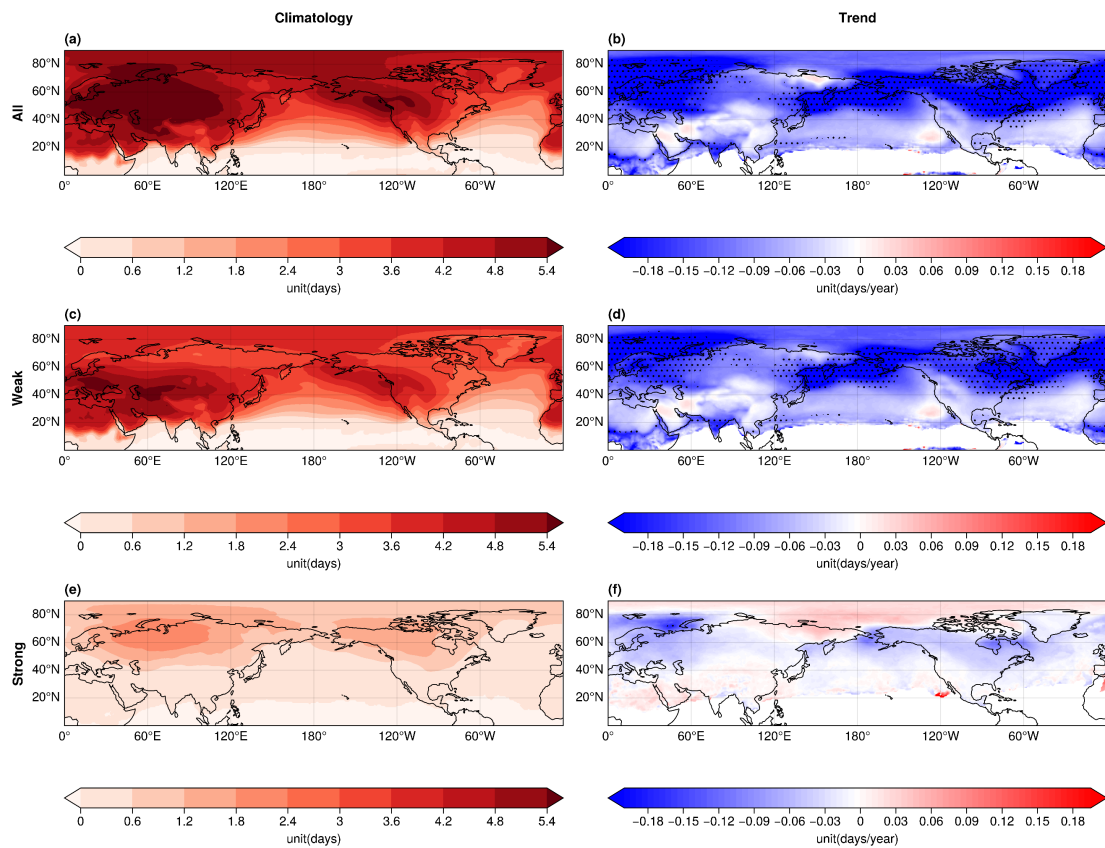

Figure S7. The distribution of climatology (left column) and trend (right column) of frequency for all (a, b), strong (c, d) and weak (e, f) ECEs based on the ensemble mean result of 1pctCO2 simulations. The dotted area indicates the region where the number of models with significant trend is greater than 11.
